# Supplementary material
Source: MDPI journal article supplement (https://www.mdpi.com/2072-4292/15/12/2991)
Supplement: s1 [file s1]

## Supplementary Materials

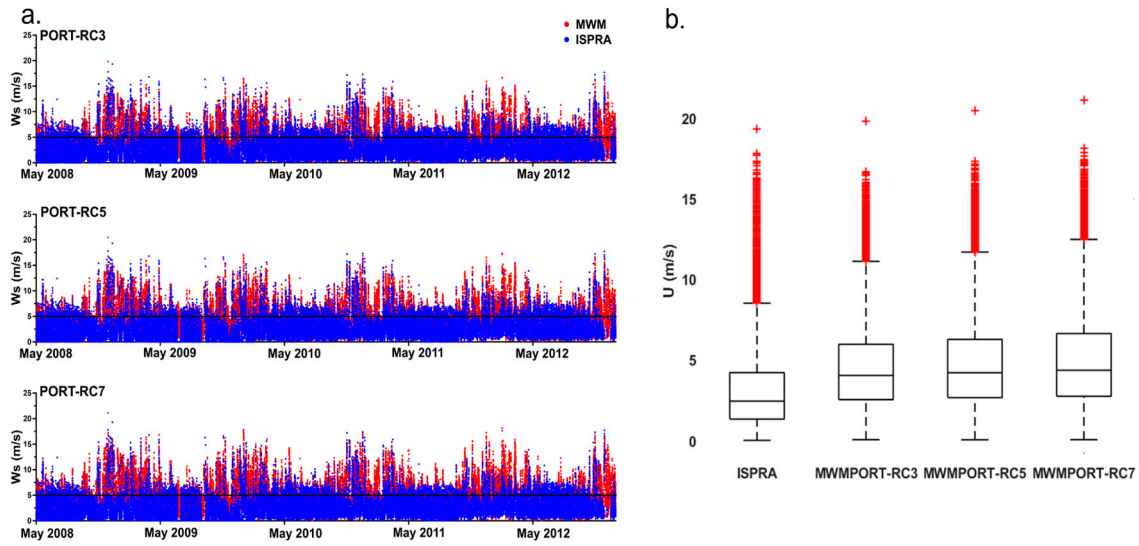

**Figure S1.** (a). Temporal series of wind speed from May 2008 to December 2012 of ISPRA (blue) and DHI model at RC3, RC5, RC7 of PORT site (red); the black line represents the wind speed threshold (5 m/s). (b). Box plots of the dataset; the outliers are identified by red crosses.

**Table S1.** Statistical metrics (correlation coefficient (CC), root mean square error (RMSE) and Hanna–Heinold index (HH)) of wind speed between the MWM model and ISPRA, seasonal comparison (2008–2009–2012). Year 2010 is shown in the text, see Table 3.

| ISPRA vs<br>MWM<br>Wind Speed | RC3  |               |      | RC5  |               |      | RC7  |               |      |
|-------------------------------|------|---------------|------|------|---------------|------|------|---------------|------|
|                               | CC   | RMSE<br>(m/s) | HH   | CC   | RMSE<br>(m/s) | HH   | CC   | RMSE<br>(m/s) | HH   |
| <b>2008 Trimester</b>         |      |               |      |      |               |      |      |               |      |
| Winter (JFM)                  | -    | -             | -    | -    | -             | -    | -    | -             | -    |
| Spring (AMJ)                  | -    | -             | -    | -    | -             | -    | -    | -             | -    |
| Summer (LAS)                  | 0.46 | 2.01          | 0.62 | 0.43 | 2.2           | 0.66 | 0.39 | 2.3           | 0.7  |
| Autumn (OND)                  | 0.64 | 3.5           | 0.73 | 0.63 | 3.7           | 0.76 | 0.62 | 3.9           | 0.8  |
| <b>2009 Trimester</b>         |      |               |      |      |               |      |      |               |      |
| Winter (JFM)                  | 0.51 | 3.9           | 0.75 | 0.5  | 4.2           | 0.78 | 0.48 | 4.5           | 0.82 |
| Spring (AMJ)                  | 0.51 | 2.6           | 0.75 | 0.49 | 2.8           | 0.79 | 0.49 | 2.9           | 0.83 |
| Summer (LAS)                  | 0.54 | 2.2           | 0.74 | 0.52 | 2.4           | 0.77 | 0.5  | 2.5           | 0.81 |
| Autumn (OND)                  | 0.52 | 3.8           | 0.73 | 0.5  | 4.1           | 0.77 | 0.49 | 4.3           | 0.81 |
| <b>2012 Trimester</b>         |      |               |      |      |               |      |      |               |      |
| Winter (JFM)                  | 0.51 | 3.2           | 0.75 | 0.49 | 3.4           | 0.78 | 0.48 | 3.7           | 0.82 |
| Spring (AMJ)                  | 0.51 | 2.3           | 0.75 | 0.49 | 2.5           | 0.79 | 0.47 | 2.7           | 0.83 |
| Summer (LAS)                  | 0.53 | 2.2           | 0.74 | 0.52 | 2.3           | 0.78 | 0.5  | 2.5           | 0.82 |
| Autumn (OND)                  | 0.52 | 2.9           | 0.73 | 0.5  | 3.1           | 0.77 | 0.49 | 3.4           | 0.81 |

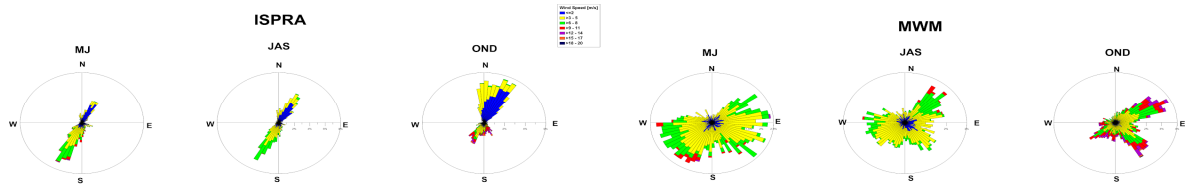

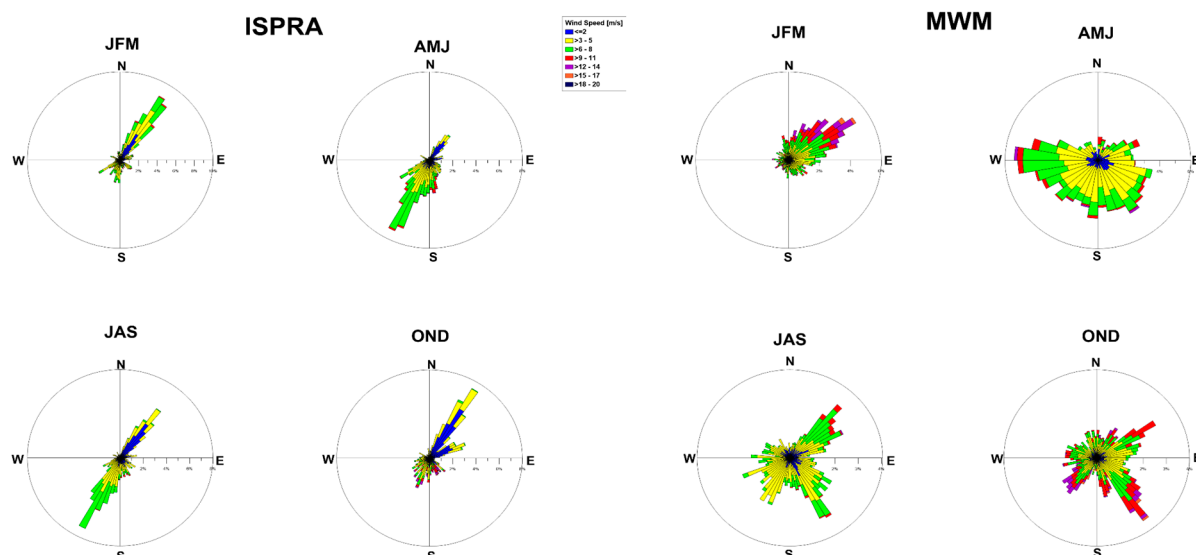

**Figure S4.** The left panel shows the seasonal wind direction for the year 2012 at the ISPRA weather station. Right panel shows the seasonal wind direction for the year 2012 in the MWM model at PORT-RC3.

**Table S2.** Statistical metrics of comparisons among HF PORT site, ISPRA weather station and MWM model wind directions with wind speed  $U > 5$  m/s at RC5 for the years 2008, 2009 and 2012. Year 2010 is shown in the text, see Table 5.

| 2008      | RC5         |              |          |           |              |          |
|-----------|-------------|--------------|----------|-----------|--------------|----------|
| Events    | HF vs ISPRA |              |          | HF vs MWM |              |          |
|           | qcc         | $\theta$ (°) | RMSE (°) | qcc       | $\theta$ (°) | RMSE (°) |
| May_19_22 |             |              |          |           |              |          |
| Jul_22_24 | 0.71        | 38.45        | 58.7     | -0.78     | 21.5         | 59.66    |
| Sep_13_16 | 0.86        | -13.69       | 33.98    | 0.54      | -19.37       | 0.45     |
| Oct_3_5   | 0.81        | 14.89        | 54.48    | 0.81      | -5.28        | 58.78    |
| Oct_30_31 | 0.59        | -33.21       | 42.39    | 0.59      | -47.53       | 55.67    |
| Nov_21_25 | 0.66        | -18.36       | 49.95    | 0.69      | -37.89       | 55.87    |
| Nov_28_30 | 0.82        | -38.98       | 43.29    | 0.86      | -52.88       | 55.67    |
| Dec_1_2   | 0.59        | -34.36       | 49.95    | 0.42      | -44.16       | 59.18    |
| Dec_4_8   | 0.69        | -38.85       | 49.66    | 0.77      | -60.26       | 65.38    |
| Dec_12_13 | -0.9        | -1.04        | 5.37     | -0.94     | -153.81      | 0        |
| Dec_15_17 |             |              |          |           |              |          |
|           | 0.37        | -22.61       | 26.16    | 0.51      | -25.26       | 31.7     |
| 2009      | RC5         |              |          |           |              |          |
| Jan_1_3   | 0.09        | -12.55       | 40.47    | 0.64      | -39.39       | 66.7     |
| Jan_14_15 |             |              |          |           |              |          |
| Mar_23_26 | 0.79        | -22.36       | 46.78    | 0.64      | -71.46       | 83.91    |
| Apr_29_30 | 0.52        | 10.18        | 44.52    | 0.32      | -20.53       | 46.65    |
| Jun_2_3   | -           | -            | -        | -         | -            | -        |
| Oct_12_13 | -           | -            | -        | -         | -            | -        |
| Nov_3_5   | 0.82        | -27.62       | 37.88    | 0.29      | -72.4        | 71.68    |
| Nov_8_9   | 0.84        | -21.99       | 35.92    | 0.66      | -43.37       | 53.09    |

|                 |      |        |       |       |        |       |
|-----------------|------|--------|-------|-------|--------|-------|
| Nov_27_28       | 0.46 | -35.94 | 44.66 | 0.47  | -72.93 | 72.08 |
| Dec_1_4         | 0.91 | -16.99 | 24.93 | 0.63  | -37.23 | 41.09 |
| Dec_6_9         | 0.59 | -48.72 | 50.57 | 0.63  | -84.64 | 84.83 |
| Dec_22_23       | 0.26 | -31.22 | 36.89 | 0.51  | -54.88 | 57.87 |
| Dec_27_29       | 0.32 | -54.98 | 56.2  | 0.23  | -90.15 | 90.77 |
| <b>2012 RC5</b> |      |        |       |       |        |       |
| Jan_4_8         | -    | -      | -     | 0.75  | -20.92 | 30.24 |
| Feb_18_19       | -0.2 | -47.29 | 51.23 | -0.23 | -59.57 | 61.98 |
| Apr_7_9         | 0.58 | -46.35 | 69.08 | -0.28 | -34.93 | 61.2  |
| Apr_11_12       | 0.18 | -55.49 | 57.07 | -0.38 | -88.46 | 76.51 |
| Apr_14_16       | 0.84 | -3.61  | 33.98 | 0.93  | -18.75 | 31.01 |
| Apr_18_21       | 0.76 | -18.81 | 51.9  | 0.74  | -42.73 | 53.23 |
| May_7_9         | -0.5 | -1.39  | 68.77 | 0.6   | -39.98 | 56.16 |
| May_21_24       | 0.19 | -18.97 | 66.06 | 0.58  | -36.01 | 63.94 |
| Sep_4_6         | 0.23 | -21.43 | 27.94 | 0.63  | -33.34 | 38.1  |
| Oct_1_3         | 0.1  | 21.28  | 42.25 | 0.6   | 9.41   | 39.53 |
| Oct_9_10        | -0.1 | -37.06 | 39.22 | 0.77  | -61.63 | 63.93 |
| Oct_15_16       | 0.88 | -18.58 | 35.02 | 0.79  | -37.95 | 47.14 |
| Oct_27_29       | 0.48 | -50.22 | 53.91 | 0.12  | -59.86 | 65.33 |
| Nov_28_30       | 0.8  | -12.33 | 42.96 | 0.78  | -11.03 | 45.68 |
| Dec_27_29       | -0.6 | -71.28 | 70.39 | -0.25 | -14.68 | 62    |
